# Supplementary material for: Virulence, antibiotic resistance phenotypes and molecular characterisation of Vibrio furnissii isolates from patients with diarrhoea
Source: Springer Nature journal article supplement (doi:10.1186/s12879-024-09273-5), 2024-04-19

# 首都医科大学附属北京友谊医院

## 医学伦理委员会伦理审查批件

批件号：2017-P2-095-01

|         |                                                                                                                                                                                                                                                                                                                                                                                                                                                             |      |      |                |     |
|---------|-------------------------------------------------------------------------------------------------------------------------------------------------------------------------------------------------------------------------------------------------------------------------------------------------------------------------------------------------------------------------------------------------------------------------------------------------------------|------|------|----------------|-----|
| 试验项目名称  | 临床分离气单胞菌 MLPA 分型、毒力基因及耐药特征分析                                                                                                                                                                                                                                                                                                                                                                                                                                |      |      |                |     |
| 申办单位    | 首都医科大学附属北京友谊医院                                                                                                                                                                                                                                                                                                                                                                                                                                              |      |      |                |     |
| 项目来源    | 首都卫生发展科研专项项目                                                                                                                                                                                                                                                                                                                                                                                                                                                |      |      |                |     |
| 本院申请部门  | 检验科                                                                                                                                                                                                                                                                                                                                                                                                                                                         | 承担责任 | 主要责任 | 项目负责人          | 周妍妍 |
| 主要审查文件  | 文件名称                                                                                                                                                                                                                                                                                                                                                                                                                                                        |      |      | 版本号/版本日期       |     |
|         | 递交信                                                                                                                                                                                                                                                                                                                                                                                                                                                         |      |      |                |     |
|         | 初始审查申请                                                                                                                                                                                                                                                                                                                                                                                                                                                      |      |      |                |     |
|         | 临床研究方案                                                                                                                                                                                                                                                                                                                                                                                                                                                      |      |      | V1.0/2017.8.15 |     |
|         | 项目概况表（科研项目用）                                                                                                                                                                                                                                                                                                                                                                                                                                                |      |      |                |     |
|         | 主要研究者专业履历                                                                                                                                                                                                                                                                                                                                                                                                                                                   |      |      |                |     |
| 伦理委员会声明 | *本伦理委员会严格按照 ICH/GCP、中国 GCP 及相关法规组成和工作。<br>*本伦理委员会的组成和工作相对独立。                                                                                                                                                                                                                                                                                                                                                                                                |      |      |                |     |
| 审查方式    | <input checked="" type="checkbox"/> 会议审查 <input type="checkbox"/> 快速审查 <input checked="" type="checkbox"/> 初始审查 <input type="checkbox"/> 跟踪审查                                                                                                                                                                                                                                                                                                               |      |      |                |     |
| 审查时间    | 2017-8-31                                                                                                                                                                                                                                                                                                                                                                                                                                                   | 会议地点 | 九层三会 |                |     |
| 审查委员    | 见会议签到表。投票 7 人，同意 7 人，作必要修正后同意 0 人，作必要修正后重审 0 人，不同意 0 人，终止或暂停已批准的试验 0 人。回避 0 人。                                                                                                                                                                                                                                                                                                                                                                              |      |      |                |     |
| 审查意见：   | 根据卫生部《涉及人的生物医学研究伦理审查办法（试行）》（2007）、SFDA《药物临床试验质量管理规范（2003）》、《医疗器械临床试验规定（2004）》、WMA《赫尔辛基宣言》和 CIOMS《人体生物医学研究国际道德指南》的伦理原则，经本伦理委员会审查：<br><b>同意按所批准的临床研究方案、知情同意书、招募材料等开展本项研究。</b><br>备注：<br>1. 本项临床试验应当在伦理委员会同意进行之日起 1 年内实施。逾期未实施的，本批件自行废止。<br>2. 修正后同意/复审项目，应将修正后文件及时反馈给伦理委员会，以便签署意见或安排复审。<br>3. 在试验实施过程中，如需对研究方案、知情同意书等文件做任何修改，应及时向本伦理委员会提交修改申请，经重新审查，获得批准后方可执行。<br>4. 发生严重不良事件及可能影响风险/受益比的任何事件和新信息须及时报告伦理委员会。<br>5. 定期/年度跟踪审查项目，于到期前 1 个月（无论试验开始与否）提交定期跟踪审查申请。 |      |      |                |     |

6. 如有不依从/违背方案或暂停/提前终止的试验项目, 应及时以书面文件告知本伦理委员会。

7. 临床试验结束后, 须及时向伦理委员会提交结题报告。请申请人提交研究完成报告。完成临床研究, 请申请人提交研究完成报告。

|             |       |
|-------------|-------|
| 年度/定期跟踪审查频率 | 12 个月 |
|-------------|-------|

|     |       |
|-----|-------|
| 有效期 | 12 个月 |
|-----|-------|

主任委员签字: 

日期: 2017 年 9 月 1 日

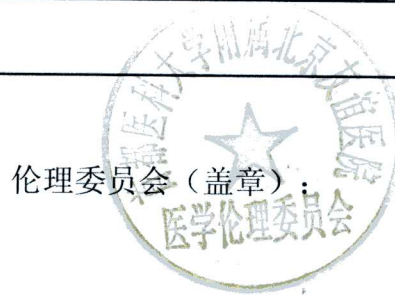

伦理委员会地址: 北京市西城区永安路 95 号 (邮编: 100050) 联系人: 崔焱 电话/传真: 010-63139017

首都医科大学附属北京友谊医院  
医学伦理委员会

伦理审批文件清单

2017-P2-095-01

研究项目：临床分离气单胞菌 MLPA 分型、毒力基因及耐药特征分析

会议审批文件：

| 文件名称         | 版本号/版本日期       |
|--------------|----------------|
| 递交信          |                |
| 初始审查申请       |                |
| 临床研究方案       | V1.0/2017.8.15 |
| 项目概况表（科研项目用） |                |
| 主要研究者专业履历    |                |

首都医科大学附属北京友谊医院

医学伦理委员会

日期：2017.9.1

### 首都医科大学附属北京友谊医院伦理委员会 会议签到表

| 姓名  | 性别 | 伦理委员会职务 | 所在单位及职务    |            | 签名                                                                                    | 日期        | 是否回避 |                                     |
|-----|----|---------|------------|------------|---------------------------------------------------------------------------------------|-----------|------|-------------------------------------|
|     |    |         |            |            |                                                                                       |           | 是    | 否                                   |
| 张建  | 男  | 主任委员    | 北京友谊医院     | 医院管理. 儿外科  |  | 2017.8.31 |      | <input checked="" type="checkbox"/> |
| 尤红  | 女  | 副主任委员   | 北京友谊医院     | 科研管理. 消化内科 |  | 2017.8.31 |      | <input checked="" type="checkbox"/> |
| 史丽敏 | 女  | 委员      | 北京友谊医院     | 药学         |   | 2017.8.31 |      | <input checked="" type="checkbox"/> |
| 徐芳  | 女  | 委员      | 北京友谊医院     | 妇产科        |    | 2017.8.31 |      | <input checked="" type="checkbox"/> |
| 马莉  | 女  | 委员      | 北京友谊医院     | 儿科学        |                                                                                       |           |      | <input checked="" type="checkbox"/> |
| 孙燕  | 女  | 委员      | 北京友谊医院     | 护理学        |    | 2017.8.31 |      | <input checked="" type="checkbox"/> |
| 邓利强 | 男  | 委员      | 北京市华卫律师事务所 | 律师         |    | 2017.8.31 |      | <input checked="" type="checkbox"/> |
| 江欢  | 男  | 委员      | 首都医科大学     | 教师         |                                                                                       |           |      | <input type="checkbox"/>            |
| 崔焱  | 女  | 委员秘书    | 北京友谊医院     | 肝脏病学       |    | 2017.8.31 |      | <input checked="" type="checkbox"/> |

本名单的适用期从 2015 年 6 月 1 口开始。若伦理委员会委员组成发生变化, 名单将及时更新。

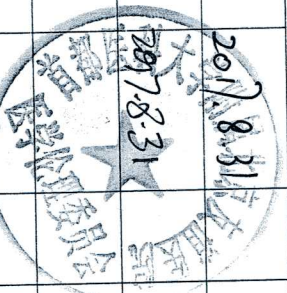

Supplement: MOESM3 [file 26997978]
