# Supplementary material for: Virulence, antibiotic resistance phenotypes and molecular characterisation of Vibrio furnissii isolates from patients with diarrhoea
Source: Springer Nature journal article supplement (doi:10.1186/s12879-024-09273-5), 2024-04-19
Supplement: MOESM1 [file 26997978]

---

## Certificate

Certificate Date: 21/09/2023

Reference: AE-44511

Customer Id: 15231

To Whom it May Concern

This is to certify that the document listed below has been edited for English language by the professional academic editing company Armstrong-Hilton Limited.

- Document Name: Virulence, antimicrobial resistance phenotypes and molecular characterisation of *Vibrio furnissii* isolates from patients with diarrhoea
- Author(s): Yanyan Zhou
- Date: 21/09/2023
- Reference: AE-44511

If you have any questions please contact us at [cs@asiaedit.com](mailto:cs@asiaedit.com) quoting the reference number above. The authors are free to acknowledge our editing service provided the manuscript has not been altered substantially after the editing.

Armstrong-Hilton has been editing and copywriting for the individuals, departments, schools and faculties of Asia's leading academic institutions for 21 years. For more details please see [www.asiaedit.com](http://www.asiaedit.com).

For and on behalf of  
Armstrong-Hilton Ltd.

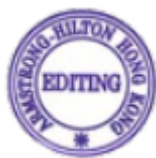

---

Armstrong-Hilton Ltd. (Authorized  
Chop)
